# Supplementary material for: Mitochondrial Protein SLIRP Affects Biosynthesis of Cytochrome c Oxidase Subunits in HEK293T Cells
Source: MDPI journal article supplement (doi:10.3390/ijms25010093), 2023-12-20
Supplement: s1 [file s1]

**Table S1. Oligonucleotides used in RT-qPCR analysis.**

| Name     | Sequence 5' – 3'               |
|----------|--------------------------------|
| qATP6_F  | CCATACACAACACTAAAGGACG         |
| qATP6_R  | GTGTAGGTGTGCCTTGTGG            |
| qATP8_F  | CCACCATAATTACCCCCATACTCC       |
| qATP8_R  | ATGGGCTTTGGTGAGGG              |
| qCOX1_F  | GGCACAGCTCTAAGCCTCC            |
| qCOX1_R  | CTCCGGCCTCCACTATAGC            |
| qCOX2_F  | CTACAAGACGCTACTTCCCC           |
| qCOX2_R  | CGATGAGGACTAGGATGATGGC         |
| qCOX3_F  | GCCCTCTCAGCCCTCC               |
| qCOX3_R  | GGCTCAGAAAAATCCTGCG            |
| qCYTB_F  | AAAATTAATTAACCACTCATTCGACC     |
| qCYTB_R  | CCGATGTGTAGGAAGAGGCAG          |
| qND1_F   | CCACCTCTAGCCTAGCCGTTTA         |
| qND1_R   | GGGTCATGATGGCAGGAGTAAT         |
| qND2_F   | CCAACCCGTCATCTACTCTACC         |
| qND2_R   | TGATGAGTATTGATTGGTAGTATTGG     |
| qND3_F   | ACACCTCCTAGCCTTACTAC           |
| qND3_R   | GGATGACATAACTATTAGTGGCAGG      |
| qND4_F   | TATTACTACCACTGACATGACTTTCC     |
| qND4_R   | TTGTAGGGAGATTAGTATAGAGAGGTAGAG |
| qND5_F   | CCTTACCACCCTCGTTAACCC          |
| qND5_R   | CACAGTGAGAATTCTATGATGGACC      |
| qND6_F   | TTGTTTCTGTTGAGTGTGGGTTAG       |
| qND6_R   | CCCCCATGCCTCAGGATAC            |
| qRNR1_F  | TAGAGGAGCCTGTTCTGTAATCGAT      |
| qRNR1_R  | CGACCCCTAAGTTTCATAAGGGCTA      |
| qRNR2_F  | GGACTAACCCCTATACCTTCTGC        |
| qRNR2_R  | TTTAGAGGGTTCTGTGGGC            |
| qACTIN_F | CACCATTGGCAATGAGCGGTTT         |
| qACTIN_R | AGGTCTTTGCGGATGTCCACGT         |
| qGAPDH_F | GTCTCCTCTGACTTCAACAGCG         |
| qGAPDH_R | ACCACCCTGTTGCTGTAGCCAA         |
